# Supplementary material
Source: ML conference proceedings conference paper supplement (https://aclanthology.org/K19-1017)
Supplement: Supplementary_Material [file K19-1017.Supplementary_Material.pdf]

# Made for Each Other: Broad-coverage Semantic Structures Meet Preposition Supersenses

**Jakob Prange**   **Nathan Schneider**  
 Georgetown University  
 jakob@cs.georgetown.edu  
 nathan.schneider@georgetown.edu

**Omri Abend**  
 The Hebrew University of Jerusalem  
 oabend@cs.huji.ac.il

## A Non-canonical phenomena requiring special rules

**Predication.** If the adposition denotes a predication via a copular construction as in “They were **back** quickly” or “was not **in** the agreement as well”, the supersense refines the syntactic object, if it is explicit, or the adposition unit itself, if not.

**Linkage.** Subordinating conjunctions, which are included as adpositional expressions if the same lemma can also be used as a canonical adposition (with a nominal object), project their supersense onto the subordinated clause (“**after** [reading some of the news]” in figure 1).

**Infinitival purpose markers.** While infinitival *to* is not considered as marking a semantic role in most cases, certain uses of *to*, which elaborate on the purpose of an action or entity, are annotated. These project their supersense onto the elaborating unit in which they occur.

**Intransitive adpositions.** If the adposition is intransitive—due to blurry definitions, we avoid the notions of *particles* and *adverbs* here—the supersense continues to refine the adposition unit (“drive 10 minutes more **down** to Stevens Creek”).

**Approximators.** Approximating adpositions like *around* and *about* (“I bought **about** half of the furniture”) similarly keep their supersense; in contrast to *intransitive* adpositions, which express

a relation between their governor and an implicit object, approximators elaborate on their object without specifying a relation towards the governor.

**Possessive pronouns.** Possessive pronouns keep their supersense refinement, whether they express true possession (“we got **our** food”) or a participant or other derived relation (“**our** company was just getting started”).

**Idiomatic PPs.** When a prepositional phrase is classified as idiomatic in STREUSLE (e.g., “in town”), its supersense refines the adposition token.

## B Extended Evaluation

See table 1 for a detailed UCCA parsing evaluation of units with a gold SNACS supersense in their yield and siblings thereof. Looking at the siblings of SNACS-labeled can tell us that getting PP unit spans right also helps with non-PP children of a scene. Furthermore, adpositions that are inter-scene Linkers in UCCA are siblings to their refined arguments. This might also be a reason why the numbers are generally lower for siblings, as getting a full scene unit correct is more difficult than smaller units. Another reason could be that the set of units that are siblings to gold-ss units is more prone to change due to small differences in the gold-ss units themselves.

| system<br>setup | ref | gold-ss labeled |             |             | gold-ss unlabeled |             |             | gold-ss sib labeled |             |             | gold-ss sib unl. |             |             |
|-----------------|-----|-----------------|-------------|-------------|-------------------|-------------|-------------|---------------------|-------------|-------------|------------------|-------------|-------------|
|                 |     | P               | R           | F           | P                 | R           | F           | P                   | R           | F           | P                | R           | F           |
| BL              | –   | 74.2            | 73.9        | 74.1        | 93.3              | 92.9        | 93.1        | 47.7                | 48.0        | 47.9        | 60.7             | 61.1        | 60.9        |
| pipeline        | ter | 76.5            | 76.2        | 76.4        | 94.5              | 94.2        | 94.4        | 48.1                | 49.2        | 48.8        | 61.1             | 62.4        | 61.7        |
|                 |     | 79.2            | 78.9        | 79.1        | 95.8              | 95.4        | 95.6        | 51.0                | 50.8        | 50.9        | 63.5             | 63.3        | 63.4        |
| indep MTL       | ter | 72.4            | 72.4        | 72.4        | <b>96.0</b>       | <b>96.0</b> | <b>96.0</b> | 46.8                | <b>50.4</b> | 48.6        | 59.8             | <b>64.5</b> | 62.1        |
| dep MTL         | ter | <b>77.5</b>     | <b>77.5</b> | <b>77.5</b> | 95.2              | 95.2        | 95.2        | 46.7                | 48.9        | 47.8        | 60.2             | 63.2        | 61.6        |
|                 | rel | 73.5            | 72.9        | 73.2        | 94.1              | 93.3        | 93.7        | <b>48.7</b>         | 50.0        | <b>49.3</b> | <b>62.4</b>      | 64.1        | <b>63.2</b> |
| joint           | ter | 73.2            | 73.1        | 73.1        | 95.2              | 95.0        | 95.1        | 47.9                | 46.9        | 47.4        | 62.2             | 60.8        | 61.5        |
|                 | rel | 73.1            | 73.1        | 73.1        | 95.2              | 95.2        | 95.2        | 44.5                | 46.3        | 45.4        | 57.7             | 59.9        | 58.8        |

**Table 1:** UCCA parsing performance on units with a gold SNACS label in their yield (*gold-ss*) and siblings of such units (*gold-ss sib*).
